# Supplementary material
Source: Springer Nature journal article supplement (https://www.springermedizin.de/resource/supplementary/13058_2011_2965_MOESM11_ESM.pdf/9702894)

Supplementary Figure 3

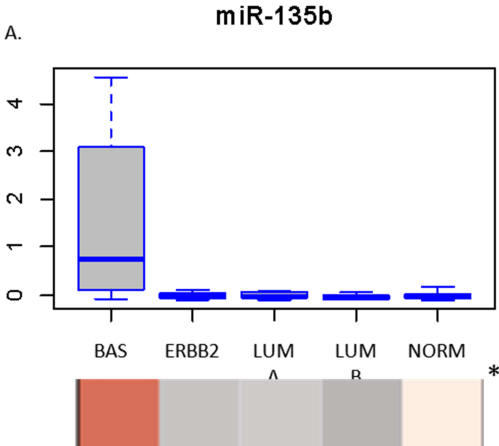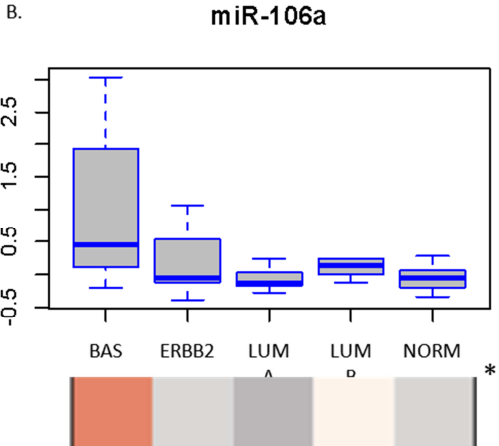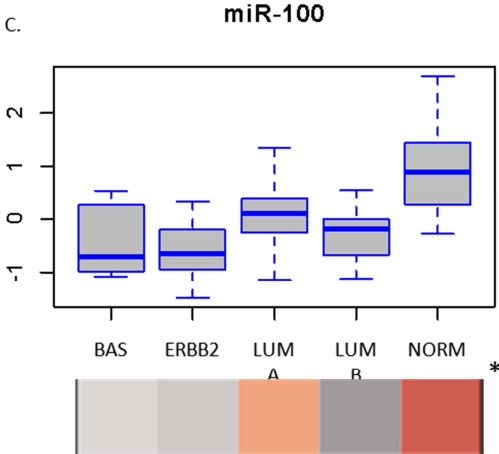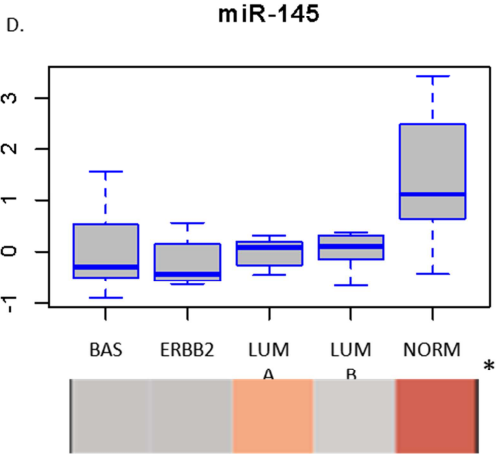

Supplement: MOESM11 [file 9702894]
